# Supplementary material for: Microbial response of nitrifying biofilms to cold-shock
Source: Royal Society of Chemistry journal article supplement (doi:10.1039/d0ew00614a), 2020-01-01
Supplement: d0ew00614a1.pdf [file d0ew00614a1.pdf]

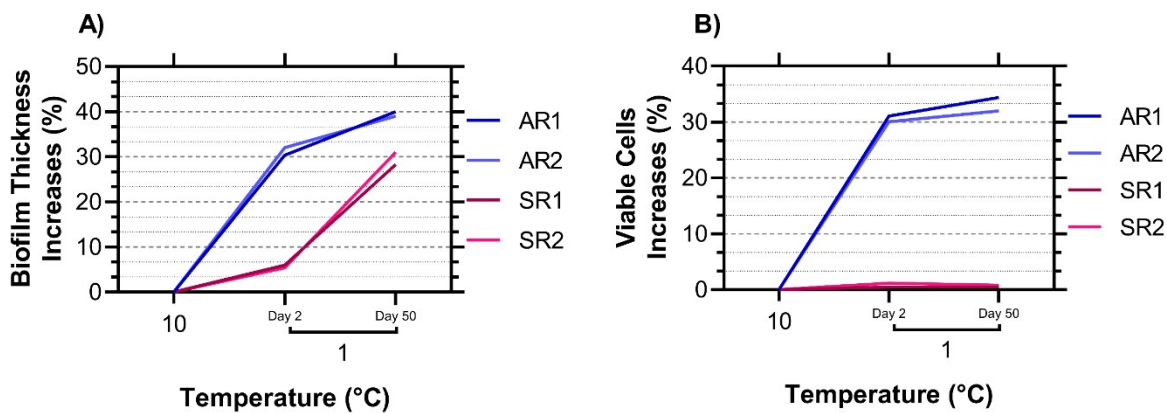

**Fig. S1** Biofilm and biomass responses for AR1-AR2 and SR1-SR2 A) biofilm thickness increases, and B) viable cells increases.

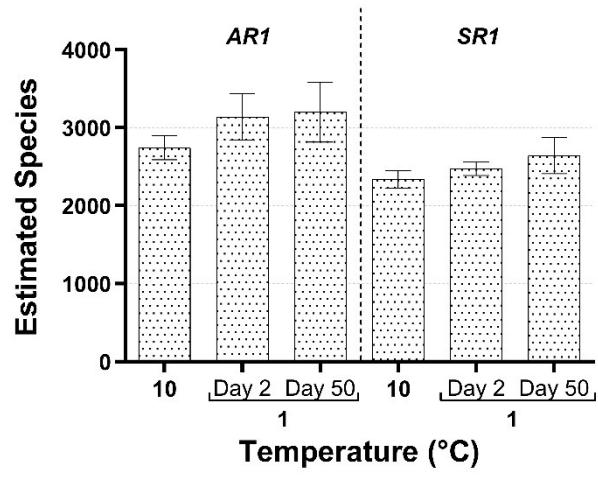

**Fig. S2**  $\alpha$ -diversity analysis (Chao 1 index) for AR1 and SR1 at 10°C and on Day 2 and 50 at 1°C.
